# Supplementary material for: An essential, kinetoplastid-specific GDP-Fuc: β-D-Gal α-1,2-fucosyltransferase is located in the mitochondrion of Trypanosoma brucei
Source: eLife. 2021 Aug 19;10:e70272. doi: 10.7554/eLife.70272 (PMC8439653; doi:10.7554/eLife.70272)
Supplement: Supplementary file 1. [file elife-70272-supp1.xlsx]

## Sheet: Sheet1
						BLASTp results
	CAZy family	Linkage	Query input		T. brucei	T. cruzi	L. major
	GT10	α1,3/1,4	CAC38049.1 (A. thaliana), AAA92977.1 (HsFUT4), AAH36037.1 (HsFUT11)			TcCLB.509233.40,	LmjF.2.0330
						TcCLB.509437.80
	GT11	α1,2(α1,3)	AAC24453.1 (HsFUT2), NP_001316806.1 (HsFUT1)		Tb927.9.3600	TcCLB.506893.90, TcCLB.508501.240	LmjF.01.0100
	GT23	α1,6	BAA19764.1 (HsFUT8)
	GT37	α1,2	AAD41092.1 (A. thaliana)
	GT41	O-Fuc	AAC49446.1 (A. thaliana)
	GT56	α1,4	AAK62972.1 (E.coli)
	GT65	O-Fuc	AAL09576.1 (HsPOFUT1)
	GT68	O-Fuc	AAK77300.1 (D. melanogaster)
	GT74	α1,2/GalT	Q54QG0.1(D. discoideum)
