# Supplementary material for: An essential, kinetoplastid-specific GDP-Fuc: β-D-Gal α-1,2-fucosyltransferase is located in the mitochondrion of Trypanosoma brucei
Source: eLife. 2021 Aug 19;10:e70272. doi: 10.7554/eLife.70272 (PMC8439653; doi:10.7554/eLife.70272)
Supplement: Supplementary file 2. [file elife-70272-supp2.xlsx]

## Sheet: Sheet1
Name	Sequence (5'-3')	Restriction sites
P1	CCCGAATCCATGAGCAACAAGGCATTCCTA	EcoRI
P2	CCACTCGAGCTACAGGAGGATCCAGTCG	XhoI
P3	ATAAGAATGCGGCCGCCGAGCGTACGTGTAACAGTAG	NotI
P4	GACGGTCCGTAAGTTTAAACGGATCCCGCTGCGTTTGTACGGCAG	BamHI, PmeI
P5	GTTTAAACTTACGGACCGTCAAGCTTGACTGCCTCCCGCGCTCC	HindIII, PmeI
P6	ATAAGAATGCGGCCGCGGCAAGTGAAGGGAAGAAGAG	NotI
P7	GGTATTATCAATACTTTTTCATCGGGCTCCGTACATCTTCTC
P8	GAGAAGATGTACGGAGCCCGATGAAAAAGTATTGATAATACC
P9	ATTAactagtgcggccgcAAGCTGTGTCTGCACCAAGATC	SpeI, NotI
P10	ACTAaagcttGACTGCCTCCCGCGCTTC	HindIII
P11	ATTAggatccCGCTGCGTTTGTACGCCAG	BamHI
P12	ACTAgagctcgcggccgcCATCCACAACGCAACAACTC	SacI, NotI
P13	CCCAAGCTTATGAGCAACAAGGCATTCCTAAC	HindIII
P14	CCCTTAATTAACTACAGGAGGATCCAGTCG	PacI
P15	ATTAaagcttATGAGCAACAAGGCATTCC	HindIII
P16	ATTActcgagCTCAGGAGGATCCAGTCGTTAC	XhoI
P17	ACTGGTCTTCAGGGCTTCCT
P18	ctaatacgactcactatagggagaGAGTTGGCGATCATGCATAC
P19	ACTGGTCTTCAGGGCTTCCT
P20	ctaatacgactcactatagggagaGAGTTGGCGATCATGCATAC
P21	AACCTAggcgcgccAGCAACAAGGCATTCCTAAC	AscI
P22	AACCTAttaattaactaCAGGAGGATCCAGTCGT	PacI
P23	AACCTAggcgcgccAGCAACAAGGCATTCCTAAC	AscI
P24	CCCAGTCAAACCAcATGTACTGTAACGACTGG
P25	CCAGTCGTTACAGTACATgTGGTTTGACTGGG
P26	ACTGATcatatgGGTCTGACAGCTGTACTG	NdeI
P27	TGACTActcgagCAGGAGGATCCAGTCGTT	XhoI
P28	CAggtaccCTATGTTGGACTGCACATTCG	KpnI
P29	AgggcccTACAGGAGGATCCAGTC	ApaI
O1	aattaAAGCTTCATATGGGCGCGCCCCTCAGCTCTAGATTCGAACTCGAGTACCCTTACGATGTGCCTGATTACGCGtagTTAATTAAGGATCCatgca	HindIII, NdeI,AscI, BbvCI, XbaI, BstBI, XhoI, PacI, BamHI
O2	tgcatGGATCCTTAATTAActaCGCGTAATCAGGCACATCGTAAGGGTACTCGAGTTCGAATCTAGAGCTGAGGGGCGCGCCCATATGAAGCTTtaatt	HindIII, NdeI,AscI, BbvCI, XbaI, BstBI, XhoI, PacI, BamHI
O3	AGCTTatgTACCCTTACGATGTGCCTGATTACGCGTACCCATACGACGTGCCAGACTACGCATACCCGTACGATGTGCCCGATTACGCAgGG
O4	CGCGCCcTGCGTAATCGGGCACATCGTACGGGTATGCGTAGTCTGGCACGTCGTATGGGTACGCGTAATCAGGCACATCGTAAGGGTAcatA
